# Supplementary material for: Interaction of Bacterial Membrane Vesicles with Specific Species and Their Potential for Delivery to Target Cells
Source: PubMed Central journal article supplement (PMC5383704; doi:10.3389/fmicb.2017.00571), 2017-04-07
Supplement: Data_Sheet_1.pdf [file Data_Sheet_1.pdf]

## SUPPLEMENTARY INFORMATION

### **Interaction of Bacterial Membrane Vesicles with Specific Species and Their Potential for Delivery to Target Cells.**

*Yosuke Tashiro<sup>1\*</sup>, Yusuke Hasegawa<sup>1</sup>, Masaki Shintani<sup>1,2,3</sup>, Kotaro Takaki<sup>4</sup>,  
Moriya Ohkuma<sup>3</sup>, Kazuhide Kimbara<sup>1,2</sup> and Hiroyuki Futamata<sup>1,2,5</sup>*

*<sup>1</sup>Applied Chemistry and Biochemical Engineering Course, Department of Engineering, Graduate School of Integrated Science and Technology, Shizuoka University, Hamamatsu, Japan, <sup>2</sup>Graduate School of Science and Technology, Shizuoka University, Hamamatsu, Japan, <sup>3</sup>Japan Collection of Microorganisms, RIKEN BioResource Center, Tsukuba, Japan, <sup>4</sup>Department of Applied Chemistry and Biochemical Engineering, Faculty of Engineering, Shizuoka University, Hamamatsu, Japan, <sup>5</sup>Research Institute of Green Science and Technology, Shizuoka University, Shizuoka, Japan*

**\*Correspondence:**

Yosuke Tashiro

tashiro.yosuke@shizuoka.ac.jp

**Supplementary Table S1. Association of MVs with each bacterial cell.<sup>a</sup>**

| MV donor strains                 | Recipient strains |              |              |              |              |              |              |              |              |              |              |              |
|----------------------------------|-------------------|--------------|--------------|--------------|--------------|--------------|--------------|--------------|--------------|--------------|--------------|--------------|
|                                  | <i>C. g.</i>      | <i>M. l.</i> | <i>B. s.</i> | <i>F. j.</i> | <i>R. h.</i> | <i>R. s.</i> | <i>H. p.</i> | <i>B. a.</i> | <i>E. c.</i> | <i>E. p.</i> | <i>P. ae</i> | <i>P. al</i> |
| <i>C. glutamicum</i> AJ224       | 280               | 456          | 172          | 483          | 50           | 101          | 26           | 546          | 123          | 14           | 80           | 72           |
| <i>M. luteus</i> JCM 1464        | 148               | 184          | 78           | 196          | 954          | 137          | 45           | 123          | 143          | 11           | 134          | 89           |
| <i>B. subtilis</i> C1            | 1135              | 1852         | 510          | 606          | 967          | 701          | 1012         | 1466         | 152          | 434          | 156          | 370          |
| <i>F. johnsoniae</i> JCM 8514    | 1549              | 2331         | 642          | 1962         | 856          | 1200         | 302          | 1406         | 162          | 706          | 108          | 756          |
| <i>R. halotolerans</i> JCM 17536 | 860               | 1794         | 369          | 954          | 471          | 701          | 158          | 677          | 156          | 178          | 106          | 297          |
| <i>R. soli</i> DS-42             | 703               | 803          | 206          | 682          | 396          | 513          | 137          | 835          | 170          | 215          | 119          | 341          |
| <i>H. pseudoflava</i> GA3        | 2111              | 3652         | 601          | 2240         | 906          | 1439         | 303          | 1585         | 147          | 477          | 149          | 660          |
| <i>B. agrestis</i> CUETM77-167   | 464               | 405          | 30           | 184          | 80           | 98           | 50           | 1713         | 153          | 63           | 121          | 183          |
| <i>E. persicina</i> HK204        | 137               | 267          | 80           | 153          | 138          | 223          | 86           | 183          | 169          | 163          | 169          | 156          |
| <i>P. aeruginosa</i> PAO1        | 1135              | 1852         | 510          | 605          | 967          | 701          | 1012         | 1465         | 510          | 434          | 501          | 370          |
| <i>P. alcaligenes</i> JCM 20561  | 808               | 1110         | 405          | 1075         | 1135         | 1632         | 408          | 906          | 201          | 808          | 131          | 805          |

<sup>a</sup> MVs associated with cells were determined by relative fluorescence units of FM4-64 normalized to the cellular protein concentration (mg/mL). The data are the average of three replicates.

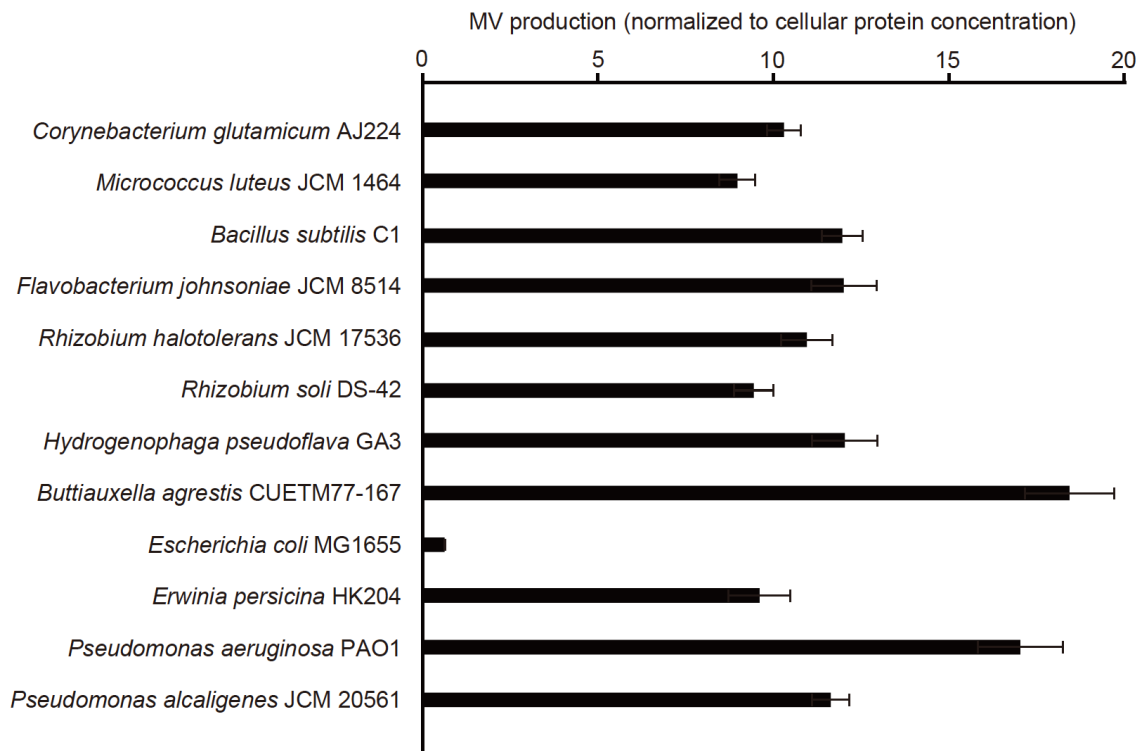

**Supplementary Figure S1. Putative MV production of each microbial strain.** Each strain was grown in TSB medium. The values are shown as the MV phospholipid concentration ( $\mu\text{g/mL}$ ) in the supernatant normalized to the cellular protein concentration ( $\text{mg/mL}$ ). The data are shown as the mean  $\pm$  standard deviation from three replicates.

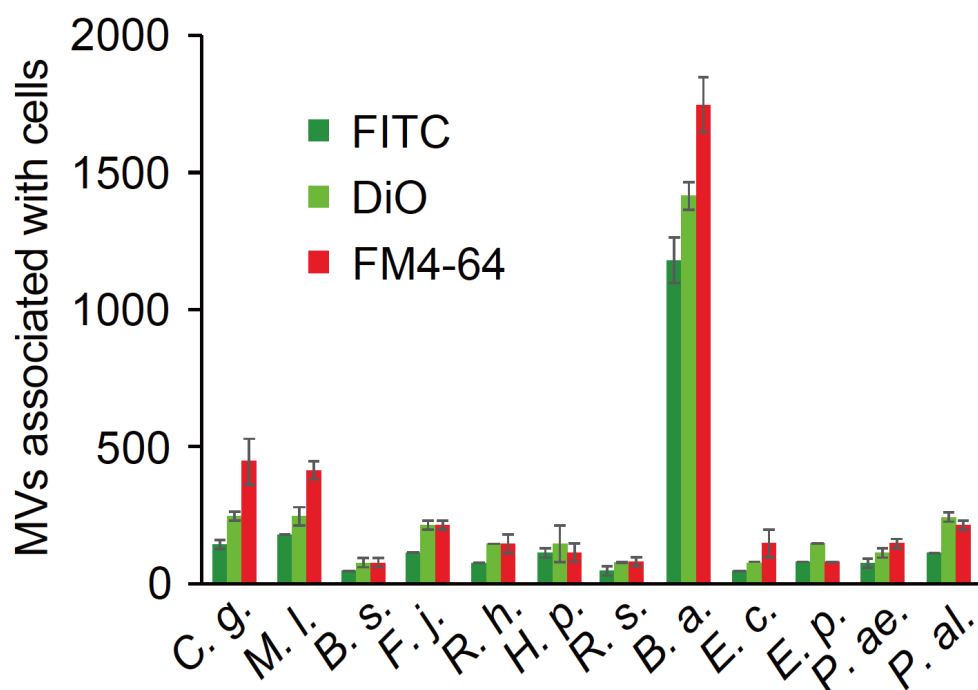

**Supplementary Figure S2. Association of MVs derived from *B. agrestis* CUETM77-167 with cells of various bacterial species.** MVs (20 µg/mL of phospholipids) were labeled with FITC, DiO or FM4-64 and incubated with bacterial cells for 30 min at 30°C. *Corynebacterium glutamicum* AJ2247 (*C. g.*), *Micrococcus luteus* JCM 1464 (*M. l.*), *Bacillus subtilis* C1 (*B. s.*), *Flavobacterium johnsoniae* JCM 8514 (*F. j.*), *Rhizobium halotolerans* JCM 17536 (*R. h.*), *R. soli* DS-42 (*R. s.*), *Hydrogenophaga pseudoflava* GA3 (*H. p.*), *Buttiauxella agrestis* CUETM77-167 (*B. a.*), *Escherichia coli* MG1655 (*E. c.*), *Erwinia persicina* HK204 (*E. p.*), *Pseudomonas aeruginosa* PAO1 (*P. ae.*) and *P. alcaligenes* JCM 20561 (*P. al.*) were used as the recipient strains. The MVs associated with cells were identified by relative fluorescence units (RFUs) of FM4-64 normalized to the cellular protein concentration (mg/mL). The data are shown as the mean ± standard deviation from three replicates.

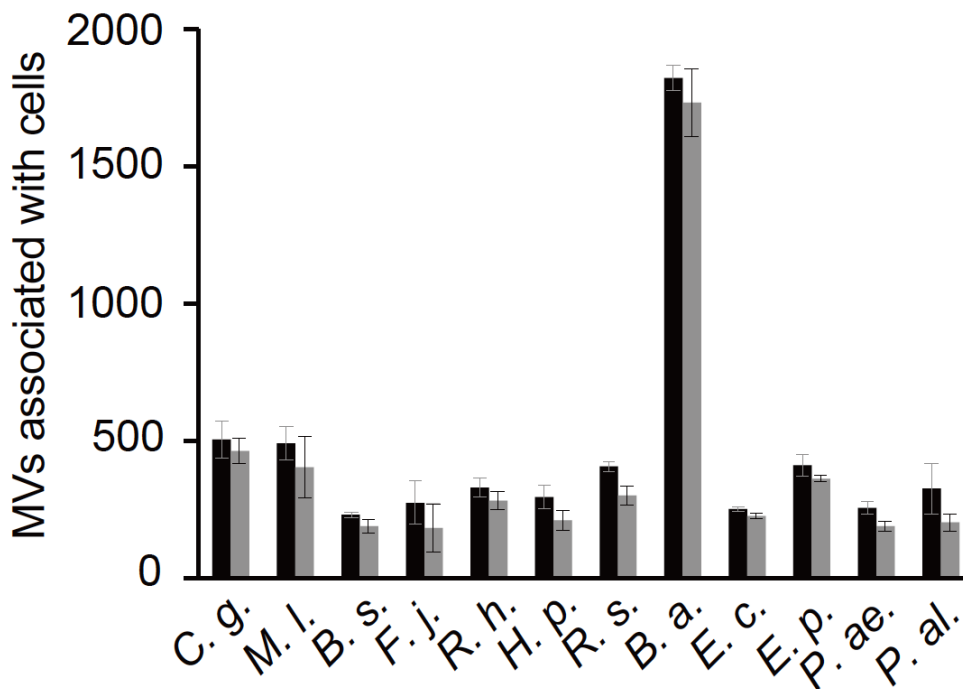

**Supplementary Figure S3. Association of MVs derived from *B. agrestis* CUETM77-167 with dead (black) and live (grey) cells of various bacterial species.** MVs (20 µg/mL of phospholipids) were labeled with FM4-64 and incubated with bacterial cells for 30 min at 30°C. *Corynebacterium glutamicum* AJ2247 (*C. g.*), *Micrococcus luteus* JCM 1464 (*M. l.*), *Bacillus subtilis* C1 (*B. s.*), *Flavobacterium johnsoniae* JCM 8514 (*F. j.*), *Rhizobium halotolerans* JCM 17536 (*R. h.*), *R. soli* DS-42 (*R. s.*), *Hydrogenophaga pseudoflava* GA3 (*H. p.*), *Buttiauxella agrestis* CUETM77-167 (*B. a.*), *Escherichia coli* MG1655 (*E. c.*), *Erwinia persicina* HK204 (*E. p.*), *Pseudomonas aeruginosa* PAO1 (*P. ae.*) and *P. alcaligenes* JCM 20561 (*P. al.*) were used as the recipient strains. Dead cells were prepared by exposure to UV for 30 min, and counting CFU showed that more than 99.99% of the cells in each strain lost the ability to grow. The MVs associated with cells were identified by RFUs of FM4-64 normalized to the cellular protein concentration (mg/mL). The data are shown as the mean ± standard deviation from three replicates.

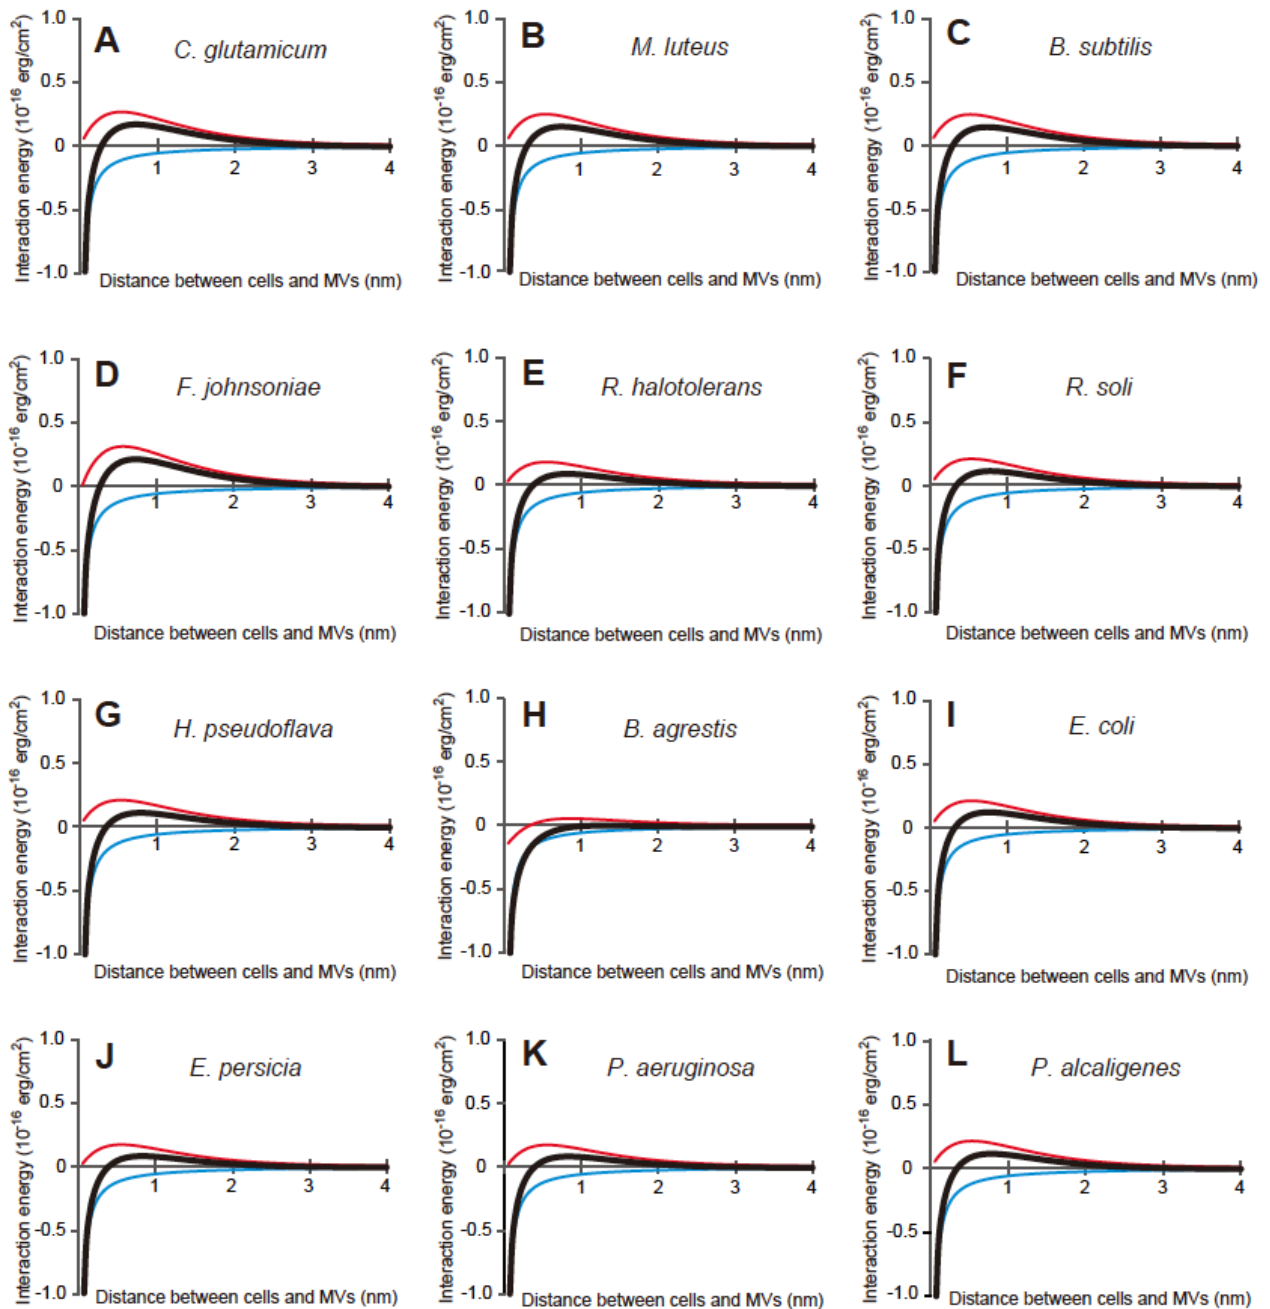

**Supplementary Figure S4. Interaction energies between MVs derived from *B. agrestis* CUETM77-167 and cells of various bacterial species.** The total interaction energies (black), London-van der Waals interaction energies (blue) and electric repulsive interaction energies (red) are shown. The primary maximum energies of each figure are shown in Figure 4C.

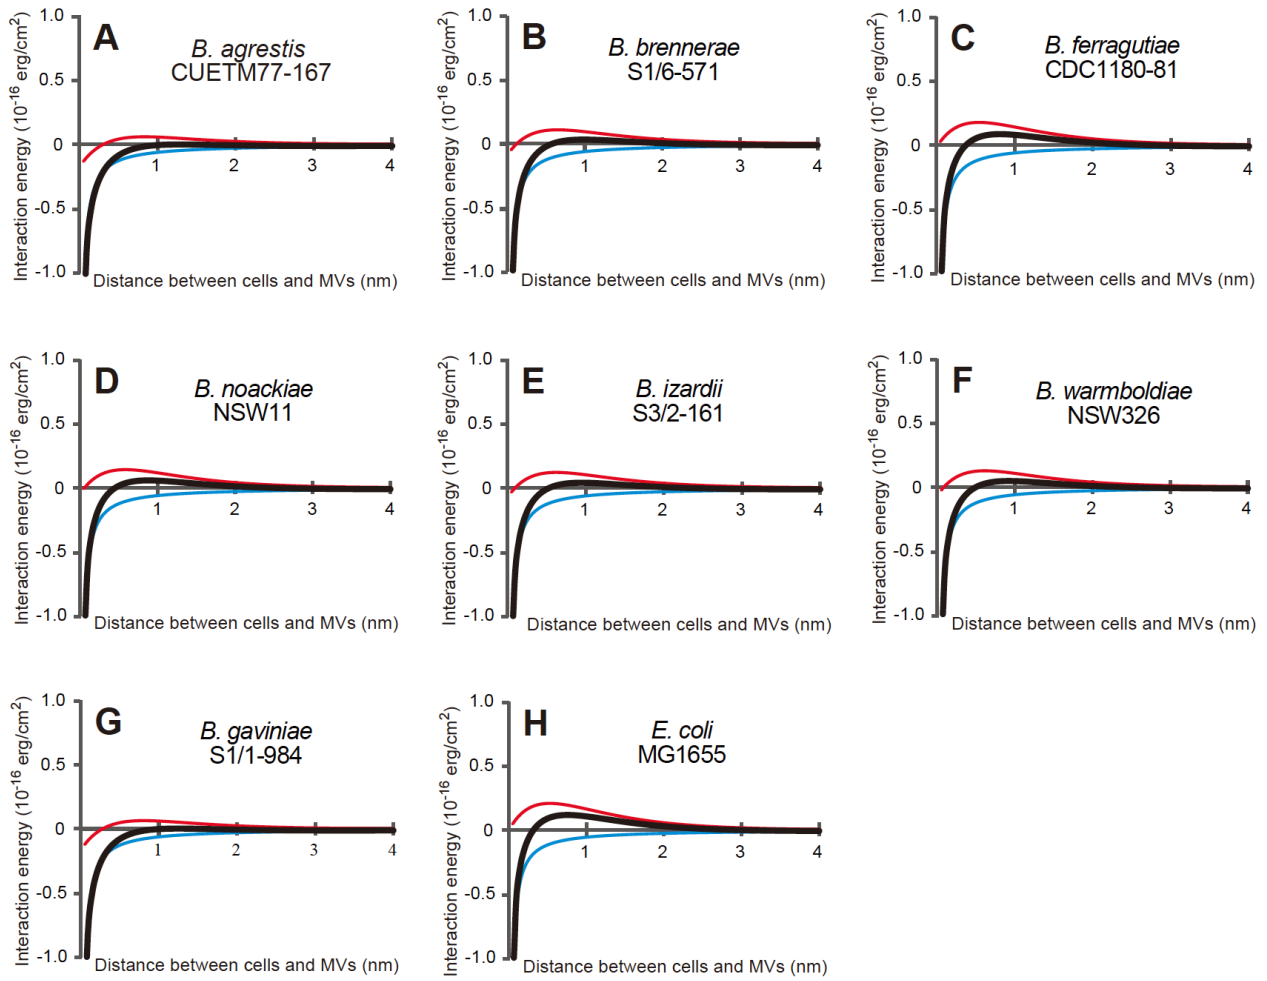

**Supplementary Figure S5. Interaction energies between MVs derived from *B. agrestis* CUETM77-167 and bacterial cells belonging to *Buttiiauxella* spp.** The total interaction energies (black), London-van der Waals interaction energies (blue) and electric repulsive interaction energies (red) are shown. The primary maximum energies of each figure are shown in Figure 5C.

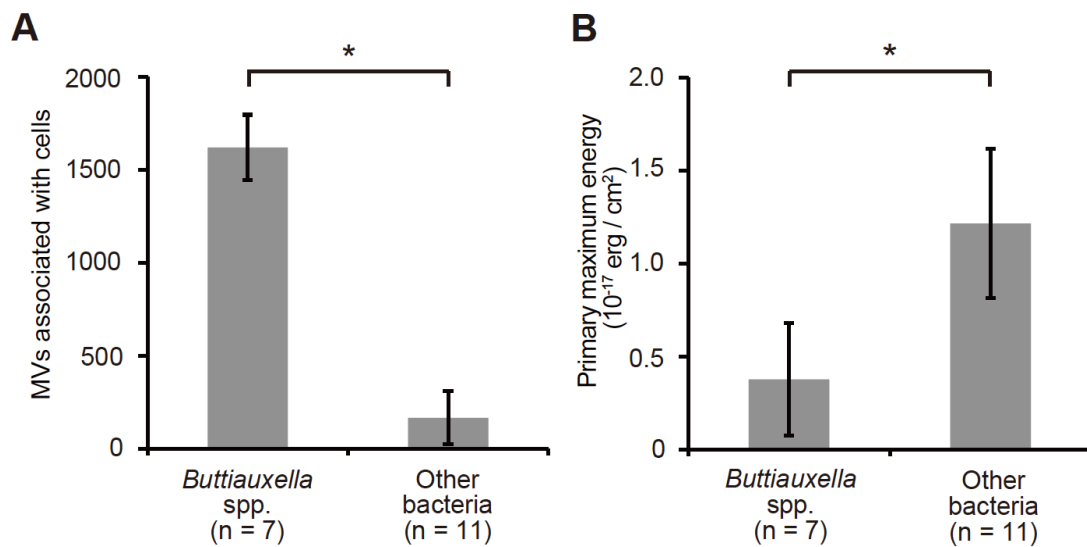

**Supplementary Figure S6. Association of MVs derived from *B. agrestis* CUETM77-167 with bacterial cells (A) and the primary maximum energy between the MVs and each cell (B).** The values of each figure are the same as in Figure 5D. Significant differences between the datasets are marked by asterisks ( $P < 0.005$ ).



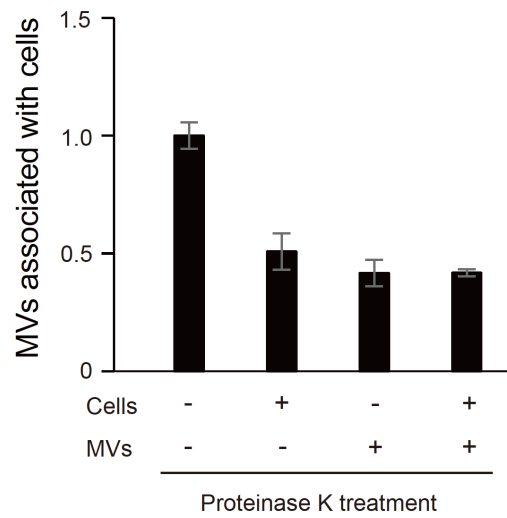

**Supplementary Figure S7. Effect of proteinase K on association of MVs derived from *B. agrestis* CUETM77-167 with bacterial cells.** MVs and/or cells were treated with 50  $\mu\text{g}/\text{mL}$  proteinase K (+, proteinase K treatment; -, no treatment). MVs (20  $\mu\text{g}/\text{mL}$  of phospholipids) derived from CUETM77-167 were labelled with FM4-64 and incubated with CUETM77-167 cells ( $\text{OD}_{600} = 1.0$ ). MVs associated with cells were identified by relative fluorescence units of FM4-64 normalized to the cellular protein concentration ( $\text{mg}/\text{mL}$ ). Values relative to the control (no proteinase K treatment) are shown. The data are shown as the means  $\pm$  standard deviation from three replicates.
